# Supplementary material
Source: PubMed Central journal article supplement (PMC2945819)
Supplement: NIHMS228908-supplement-1_si_001.pdf [file NIHMS228908-supplement-1_si_001.pdf]

# **Supplementary Information**

**Structural Determinants for the Stereoselective Hydrolysis of Chiral Substrates by**

**Phosphotriesterase**

**Table S1.** Structure parameters for the complexes between the G60A mutant and the R<sub>p</sub>- and S<sub>p</sub>-enantiomers of **1** and **2**.

| Substrate         | Parameters       | Initial Pose   |                |                |                |                |                |
|-------------------|------------------|----------------|----------------|----------------|----------------|----------------|----------------|
|                   |                  | R <sub>L</sub> | R <sub>A</sub> | R <sub>M</sub> | S <sub>L</sub> | S <sub>A</sub> | S <sub>M</sub> |
| Compound <b>1</b> | A <sub>L</sub>   | 163±7          | 159±7          | 86±7           | 123±14         | 66±6           | 89±6           |
|                   | A <sub>A</sub>   | 70±6           | 83.4±7         | 92±4           | 80±6           | 148±6          | 99±7           |
|                   | A <sub>M</sub>   | 91±9           | 88.5±8         | 163±5          | 128±11         | 104±6          | 150±6          |
|                   | d <sub>PO</sub>  | 3.4±0.1        | 3.5±0.2        | 3.7±0.1        | 3.9±0.1        | 3.6±0.1        | 4.0±0.2        |
|                   | d <sub>ZnO</sub> | 2.1±0.1        | 2.1±0.1        | 2.1±0.1        | 2.1±0.1        | 2.2±0.1        | 2.1±0.1        |
| Compound <b>2</b> | A <sub>L</sub>   | 162±5          | 102±9          | 76±6           | 78±12          | 82±11          | 103±5          |
|                   | A <sub>A</sub>   | 72±6           | 144±10         | 93±9           | 156±10         | 157±6          | 86±4           |
|                   | A <sub>M</sub>   | 93±6           | 72±5           | 165±7          | 89±12          | 87±8           | 144±5          |
|                   | d <sub>PO</sub>  | 3.4±0.1        | 3.4±0.2        | 3.6±0.2        | 3.6±0.2        | 3.6±0.1        | 4.1±0.1        |
|                   | d <sub>ZnO</sub> | 2.1±0.1        | 2.2±0.1        | 2.1±0.1        | 2.1±0.1        | 2.1±0.1        | 2.1±0.1        |

**Table S2.** Structure parameters for the complexes between the GWT mutant and the R<sub>p</sub>- and S<sub>p</sub>-enantiomers of **1** and **2**.

| Substrate         | Parameters       | Initial Pose   |                |                |                |                |                |
|-------------------|------------------|----------------|----------------|----------------|----------------|----------------|----------------|
|                   |                  | R <sub>L</sub> | R <sub>A</sub> | R <sub>M</sub> | S <sub>L</sub> | S <sub>A</sub> | S <sub>M</sub> |
| Compound <b>1</b> | A <sub>L</sub>   | 148±9          | 105±11         | 102±9          | 150±8          | 66±6           | 91±6           |
|                   | A <sub>A</sub>   | 85±7           | 143±11         | 96±6           | 100±8          | 145±7          | 101±8          |
|                   | A <sub>M</sub>   | 97±9           | 71±5           | 144±7          | 77±8           | 113 ±7         | 145±6          |
|                   | d <sub>PO</sub>  | 3.8±0.2        | 3.5±0.1        | 4.1±0.1        | 3.6±0.2        | 3.6±0.1        | 4.1±0.1        |
|                   | d <sub>ZnO</sub> | 2.1±0.1        | 2.1±0.1        | 2.1±0.1        | 2.1±0.1        | 2.2±0.1        | 2.1±0.1        |
| Compound <b>2</b> | A <sub>L</sub>   | 151±12         | 91±8           | 95±6           | 149±8          | 80±8           | 101±6          |
|                   | A <sub>A</sub>   | 71±6           | 156±9          | 87±4           | 79±7           | 156±8          | 92±4           |
|                   | A <sub>M</sub>   | 95±16          | 75±6           | 158±6          | 96 ±12         | 94±12          | 144±5          |
|                   | d <sub>PO</sub>  | 3.5±0.2        | 3.4±0.1        | 3.8±0.1        | 3.8±0.2        | 3.6±0.2        | 4.1±0.1        |
|                   | d <sub>ZnO</sub> | 2.1±0.1        | 2.1±0.1        | 2.1±0.1        | 2.1±0.1        | 2.1±0.1        | 2.1±0.1        |

**Table S3.** Structure parameters for the complexes between the YT mutant and the R<sub>p</sub>- and S<sub>p</sub>-enantiomers of **1** and **2**.

| Substrate         | Parameters       | Initial Pose   |                |                |                |                |                |
|-------------------|------------------|----------------|----------------|----------------|----------------|----------------|----------------|
|                   |                  | R <sub>L</sub> | R <sub>A</sub> | R <sub>M</sub> | S <sub>L</sub> | S <sub>A</sub> | S <sub>M</sub> |
| Compound <b>1</b> | A <sub>L</sub>   | 146±9          | 162±8          | 86±6           | 152±6          | 128±7          | 122±14         |
|                   | A <sub>A</sub>   | 86±8           | 85±9           | 91±4           | 91±7           | 120±7          | 89 ±5          |
|                   | A <sub>M</sub>   | 99±12          | 76±5           | 164±6          | 83±6           | 70±5           | 126±12         |
|                   | d <sub>PO</sub>  | 3.9±0.2        | 3.4±0.1        | 3.7±0.1        | 3.6±0.1        | 3.6±0.2        | 4.1±0.1        |
|                   | d <sub>ZnO</sub> | 2.1±0.1        | 2.1±0.1        | 2.1±0.1        | 2.1±0.1        | 2.1±0.1        | 2.1±0.1        |
| Compound <b>2</b> | A <sub>L</sub>   | 150±8          | 146±10         | 89±6           | 152±5          | 59±5           | 94±6           |
|                   | A <sub>A</sub>   | 87±8           | 88±6           | 90±4           | 85±7           | 139±7          | 75±5           |
|                   | A <sub>M</sub>   | 86±8           | 96±13          | 159±6          | 83±7           | 120±7          | 156±5          |
|                   | d <sub>PO</sub>  | 3.8±0.2        | 3.8±0.2        | 3.8±0.1        | 3.7±0.1        | 3.5±0.1        | 3.8±0.1        |
|                   | d <sub>ZnO</sub> | 2.1±0.1        | 2.1±0.1        | 2.1±0.1        | 2.1±0.1        | 2.1±0.1        | 2.1±0.1        |

**Table S4.** Structure parameters for the complexes between the GGY mutant and the R<sub>p</sub>- and S<sub>p</sub>-enantiomers of **1** and **2**.

| Substrate         | Parameters       | Initial Pose   |                |                |                |                |                |
|-------------------|------------------|----------------|----------------|----------------|----------------|----------------|----------------|
|                   |                  | R <sub>L</sub> | R <sub>A</sub> | R <sub>M</sub> | S <sub>L</sub> | S <sub>A</sub> | S <sub>M</sub> |
| Compound <b>1</b> | A <sub>L</sub>   | 150±5          | 139±6          | 95±7           | 150±9          | 75±6           | 130 ±8         |
|                   | A <sub>A</sub>   | 68±6           | 103±7          | 86±5           | 100±9          | 160±5          | 77±9           |
|                   | A <sub>M</sub>   | 104±9          | 86±13          | 159±6          | 75±7           | 88±7           | 128±8          |
|                   | d <sub>PO</sub>  | 3.5±0.1        | 3.8±0.3        | 3.7±0.1        | 3.6±0.1        | 3.6±0.1        | 3.9±0.2        |
|                   | d <sub>ZnO</sub> | 2.1±0.1        | 2.1±0.1        | 2.1±0.1        | 2.1±0.1        | 2.1±0.1        | 2.1±0.1        |
| Compound <b>2</b> | A <sub>L</sub>   | 130±9          | 88±7           | 78±9           | 144±8          | 65±5           | 97±6           |
|                   | A <sub>A</sub>   | 91±5           | 153±6          | 93±6           | 102±8          | 150±10         | 93±6           |
|                   | A <sub>M</sub>   | 109±9          | 80±7           | 163±6          | 77±6           | 107±12         | 155±5          |
|                   | d <sub>PO</sub>  | 4.2±0.2        | 3.7±0.2        | 3.6±0.2        | 3.8±0.2        | 3.5±0.1        | 3.9±0.1        |
|                   | d <sub>ZnO</sub> | 2.1±0.1        | 2.1±0.2        | 2.1±0.1        | 2.1±0.1        | 2.1±0.1        | 2.1±0.1        |

**Table S5.** Structure parameters for the complexes between the QFmutant and the R<sub>p</sub>- and S<sub>p</sub>-enantiomers of **1** and **2**.

| Substrate         | Parameters       | Initial Pose   |                |                |                |                |                |
|-------------------|------------------|----------------|----------------|----------------|----------------|----------------|----------------|
|                   |                  | R <sub>L</sub> | R <sub>A</sub> | R <sub>M</sub> | S <sub>L</sub> | S <sub>A</sub> | S <sub>M</sub> |
| Compound <b>1</b> | A <sub>L</sub>   | 155±7          | 103±7          | 93±8           | 147±9          | 72±11          | 90±6           |
|                   | A <sub>A</sub>   | 75±11          | 145±6          | 100±8          | 99 ±9          | 153±10         | 88±7           |
|                   | A <sub>M</sub>   | 99±7           | 71±4           | 149±6          | 80±6           | 98±15          | 157±7          |
|                   | d <sub>PO</sub>  | 3.6±0.2        | 3.5±0.1        | 4.1±0.1        | 3.7±0.2        | 3.5±0.2        | 3.9±0.2        |
|                   | d <sub>ZnO</sub> | 2.1±0.1        | 2.1±0.1        | 2.1±0.1        | 2.1±0.1        | 2.1±0.1        | 2.1±0.1        |
| Compound <b>2</b> | A <sub>L</sub>   | 166±5          | 91±10          | 88±7           | 150±5          | 68±6           | 76±8           |
|                   | A <sub>A</sub>   | 69±5           | 154 ±10        | 92±5           | 91±6           | 155±6          | 96±7           |
|                   | A <sub>M</sub>   | 89±6           | 73±5           | 161±6          | 84±6           | 105±7          | 156±7          |
|                   | d <sub>PO</sub>  | 3.3±0.1        | 3.5±0.1        | 3.9±0.1        | 3.8±0.1        | 3.6±0.2        | 3.7±0.2        |
|                   | d <sub>ZnO</sub> | 2.1±0.1        | 2.1±0.1        | 2.1±0.1        | 2.1±0.1        | 2.1±0.1        | 2.1±0.1        |
